# Supplementary material
Source: publisher site journal article supplement (https://www.dovepress.com/article/300519)
Supplement: Supplementary file 1 [file get_supplementary_file.php]

Supplementary materials

**Table S1** Comparison of basic information between reading habit and quality of sleep

| Variables | Reading Habit | | *P* | Frequency of poor sleep | | | | *P* |
| --- | --- | --- | --- | --- | --- | --- | --- | --- |
| Yes | No | <1 day | 1-2 days | 3-4 days | 5-7 days |
| ***Geographic information*** | | | | | | | | |
| Resident Place |  |  | <0.001 |  |  |  |  | <0.001 |
| Rural | 95(4.92) | 8,621(54.52) |  | 4,191(41.11) | 2,960(53.59) | 1,413(63.63) | 1,007(63.96) |  |
| Urban | 1,836(95.08) | 7,192(45.48) |  | 4,134(58.89) | 2,822(46.41) | 1,287(36.37) | 784(36.04) |  |
| Sex |  |  | <0.001 |  |  |  |  | <0.001 |
| Female | 1,052(37.33) | 8,404(52.78) |  | 3,447(36.46) | 3,126(33.06) | 1,730(18.3) | 1,152(12.18) |  |
| Male | 1,766(62.67) | 7,518(47.22) |  | 4,937(53.19) | 2,707(29.16) | 989(10.66) | 649(6.99) |  |
| Marital Status |  |  | <0.001 |  |  |  |  | <0.001 |
| Unmarried; | 38(1.35) | 185(1.16) |  | 107(1.28) | 57(0.98) | 38(1.40) | 21(1.17) |  |
| Married | 2,488(88.29) | 13,886(87.21) |  | 7,466(89.05) | 5,116(87.71) | 2,342(86.13) | 1,448(80.40) |  |
| Cohabit | 15(0.53) | 68(0.43) |  | 24(0.29) | 26(0.45) | 13(0.48) | 20(1.11) |  |
| Divorced | 105(3.73) | 277(1.74) |  | 167(1.99) | 121(2.07) | 53(1.95) | 41(2.28) |  |
| Widowed | 172(6.10) | 1,506(9.46) |  | 620(7.40) | 513(8.79) | 273(10.04) | 271(15.05) |  |
| Educational level |  |  | <0.001 |  |  |  |  | <0.001 |
| Illiterate | 133(4.72) | 5,965(37.47) |  | 2,426(28.94) | 1,831(31.39) | 1,015(37.33) | 824(45.75) |  |
| Primary school | 473(16.78) | 4,308(27.06) |  | 2,162(25.79) | 1,467(25.15) | 707(26.00) | 445(24.71) |  |
| Junior high school | 992(35.20) | 3,911(24.57) |  | 2,314(27.60) | 1,613(27.65) | 642(23.61) | 333(18.49) |  |
| Senior high school or | 1,220(43.29) | 1,737(10.91) |  | 1,481(17.67) | 922(15.81) | 355(13.06) | 199(11.06) |  |
| Age (mean±sd) | 55.06±10.84 | 58.17±10.44 | <0.001 | 57.44±10.52 | 56.92±10.46 | 58.31±10.41 | 60.47±10.71 | <0.001 |
| Family size (mean±sd) | 3.61±1.72 | 4.02±2.03 | <0.001 | 3.97±2.00 | 3.96±1.96 | 3.96±1.98 | 3.85±2.05 | 0.118 |
| ***Socioeconomic related variables*** | | | | | | | | |
| Life Satisfaction | 3.97±0.90 | 4.11±0.99 | <0.001 | 4.19±0.92 | 4.04±0.96 | 3.96±1.06 | 4.02±1.09 | <0.001 |
| Income Status | 2.90±0.97 | 2.97±1.16 | 0.002 | 3.02±1.11 | 2.94±1.09 | 2.83±1.16 | 2.88±1.28 | <0.001 |
| Social Ladder | 3.14±1.01 | 3.26±1.14 | <0.001 | 3.30±1.10 | 3.23±1.09 | 3.11±1.18 | 3.18±1.23 | <0.001 |
| ***Lifestyle*** | | | | | | | | |
| Smoking |  |  | <0.001 |  |  |  |  | <0.001 |
| Yes | 941(33.39) | 4,760(29.90) |  | 2,956(35.26) | 1,655(28.38) | 639(23.50) | 450(24.99) |  |
| No | 1,877(66.61) | 11,161(70.10) |  | 5,428(64.74) | 4,177(71.62) | 2,080(76.50) | 1,351(75.01) |  |
| Drinking |  |  | <0.001 |  |  |  |  | <0.001 |
| Yes | 576(20.44) | 2,683(16.85) |  | 1,756(20.94) | 913(15.66) | 351(12.91) | 238(13.21) |  |
| No | 2,242(79.56) | 13,237(83.15) |  | 6,628(79.06) | 4,918(84.34) | 2,368(87.09) | 1,563(86.79) |  |
| Napping Habit |  |  | <0.001 |  |  |  |  | <0.001 |
| Yes | 1,815(64.43) | 9,062(56.93) |  | 4,998(59.63) | 3,421(58.66) | 1,496(55.02) | 961(53.36) |  |
| No | 1,002(35.57) | 6,857(43.07) |  | 3,383(40.37) | 2,411(41.34) | 1,223(44.98) | 840(46.64) |  |
| Frequency of Physical exercise  (mean±sd) | 3.99±3.43 | 2.77±3.48 | <0.001 | 2.98±3.52 | 2.98±3.51 | 2.80±3.43 | 2.99±3.47 | 0.104 |
| ***Health related variables*** | | | | | | | | |
| Self-perceived Health |  |  | <0.001 |  |  |  |  | <0.001 |
| Excellent | 241(8.55) | 1,755(11.02) |  | 1,270(15.15) | 456(7.82) | 156(5.74) | 113(6.28) |  |
| Very good | 330(11.71) | 1,714(10.77) |  | 1,221(14.56) | 543(9.31) | 179(6.58) | 101(5.61) |  |
| Good | 1,418(50.32) | 5,877(36.92) |  | 3,421(40.80) | 2,465(42.27) | 897(32.99) | 512(28.44) |  |
| Fairy | 391(13.88) | 2,668(16.76) |  | 1,202(14.34) | 1,102(18.90) | 481(17.69) | 274(15.22) |  |
| Poor | 438(15.54) | 3,906(24.54) |  | 1,270(15.15) | 1,266(21.71) | 1,006(37.00) | 800(44.44) |  |
| Unwell feeling |  |  | <0.001 |  |  |  |  | <0.001 |
| Yes | 915(32.47) | 5,994(37.65) |  | 2,125(25.35) | 2,292(39.29) | 1,423(52.35) | 1,068(59.30) |  |
| No | 1,903(67.53) | 9,926(62.35) |  | 6,258(74.65) | 3,541(60.71) | 1,295(47.65) | 733(40.70) |  |
| Chronic disease |  |  | 0.634 |  |  |  |  | <0.001 |
| Yes | 645(22.89) | 3,709(23.30) |  | 1,448(17.27) | 1,419(24.33) | 845(31.08) | 642(35.65) |  |
| No | 2,173(77.11) | 12,210(76.70) |  | 6,935(82.73) | 4,413(75.67) | 1,874(68.92) | 1,159(64.35) |  |
| Memorizing ability |  |  | <0.001 |  |  |  |  | <0.001 |
| A little | 279(9.92) | 3,840(24.16) |  | 1,535(18.35) | 1,250(21.44) | 747(27.52) | 585(32.65) |  |
| A few | 302(10.74) | 2,723(17.14) |  | 1,192(14.25) | 1,001(17.17) | 503(18.53) | 329(18.36) |  |
| Half | 723(25.70) | 4,847(30.50) |  | 2,396(28.64) | 1,893(32.48) | 815(30.03) | 465(25.95) |  |
| Most | 922(32.78) | 2,570(16.17) |  | 1,803(21.55) | 1,057(18.13) | 404(14.89) | 228(12.72) |  |
| All | 587(20.87) | 1,911(12.03) |  | 1,440(17.21) | 628(10.77) | 245(9.03) | 185(10.32) |  |
| Frequency of depression |  |  | <0.001 |  |  |  |  | <0.001 |
| >1 day | 1,149(40.79) | 7,080(44.53) |  | 5,146(61.44) | 1,894(32.50) | 711(26.19) | 477(26.54) |  |
| 1-2 days | 1,412(50.12) | 6,561(41.26) |  | 2,645(31.58) | 3,326(57.07) | 1,302(47.96) | 700(38.95) |  |
| 3-4 days | 183(6.50) | 1,500(9.43) |  | 382(4.56) | 435(7.46) | 541(19.93) | 325(18.09) |  |
| 5-7 days | 73(2.59) | 759(4.77) |  | 202(2.41) | 173(2.97) | 161(5.93) | 295(16.42) |  |
| BMI (mean±sd) | 23.67±3.25 | 23.38±3.51 | <0.001 | 23.65±3.42 | 23.36±3.38 | 23.07±3.52 | 23.08±3.83 | <0.001 |

**Notes:** Values are presented as n (%).

**Table S2** Association between reading and sleep duration in middle-aged and elderly populations

| Models | No reading habit | | |  | Reading quantity | | |
| --- | --- | --- | --- | --- | --- | --- | --- |
| Beta | 95% CI | *P* |  | Beta | 95% CI | *P* |
| ***Individuals who report total sleep duration*** | | | | | | | |
| Model 0 | 0.040 | 0.006-0.074 | 0.023 |  | -0.002 | -0.007-0.003 | 0.360 |
| Model 1 | 0.030 | -0.006-0.067 | 0.102 |  | -0.003 | -0.007-0.002 | 0.305 |
| Model 2 | 0.042 | 0.008-0.076 | 0.016 |  | -0.002 | -0.007-0.002 | 0.340 |
| Model 3 | 0.047 | 0.012-0.082 | 0.009 |  | -0.002 | -0.007-0.002 | 0.328 |
| Model 4 | 0.040 | 0.005-0.074 | 0.026 |  | -0.001 | -0.006-0.004 | 0.614 |
| Model 5 | 0.034 | -0.003-0.070 | 0.069 |  | -0.002 | -0.006-0.003 | 0.525 |
| ***Individuals who report weekday&weekend days sleep duration*** | | | | | | | |
| Model 0 | 0.020 | 0.002-0.037 | 0.028 |  | 0.000 | -0.004-0.004 | 0.936 |
| Model 1 | 0.013 | -0.005-0.032 | 0.166 |  | 0.001 | -0.003-0.005 | 0.752 |
| Model 2 | 0.024 | 0.006-0.041 | 0.008 |  | 0.000 | -0.004-0.004 | 0.933 |
| Model 3 | 0.020 | 0.003-0.038 | 0.024 |  | 0.000 | -0.004-0.004 | 0.982 |
| Model 4 | 0.018 | 0.000-0.035 | 0.049 |  | 0.000 | -0.004-0.004 | 0.980 |
| Model 5 | 0.016 | -0.003-0.034 | 0.106 |  | 0.001 | -0.003-0.005 | 0.696 |

**Notes:** Model 0 only included reading habit as explanatory variable; model 1 was based on model 0 and included demographic information as independent variables; model 2 was based on model 0 and included socioeconomic variables; model 3 was based on model 0 and included lifestyle-related variables; model 4 included health-related variables and reading habits; model 5 included all variables

**Abbreviations:** CI, Confidence interval; OR, Odds Ratio.

**Table S3** Association between reading habit (whether reading) and sleep-onset time in middle-aged and elderly populations

| Models | OR | 95% CI | *P* |
| --- | --- | --- | --- |
| ***Individuals who report total sleep duration*** | | | |
| Model 0 | 0.808 | 0.760-0.859 | <0.001 |
| Model 1 | 0.914 | 0.858-0.974 | 0.006 |
| Model 2 | 0.811 | 0.762-0.864 | <0.001 |
| Model 3 | 0.818 | 0.769-0.870 | <0.001 |
| Model 4 | 0.840 | 0.789-0.894 | <0.001 |
| Model 5 | 0.921 | 0.861-0.985 | 0.016 |
| ***Individuals who report weekday&weekend days sleep duration*** | | | |
| Model 0 | 0.794 | 0.762-0.827 | <0.001 |
| Model 1 | 0.918 | 0.879-0.959 | <0.001 |
| Model 2 | 0.796 | 0.764-0.830 | <0.001 |
| Model 3 | 0.793 | 0.761-0.827 | <0.001 |
| Model 4 | 0.818 | 0.784-0.852 | <0.001 |
| Model 5 | 0.923 | 0.883-0.964 | <0.001 |

**Notes:** Model 0 only included reading habit as explanatory variable; model 1 was based on model 0 and included demographic information as independent variables; model 2 was based on model 0 and included socioeconomic variables; model 3 was based on model 0 and included lifestyle-related variables; model 4 included health-related variables and reading habits; model 5 included all variables

**Abbreviations:** CI, Confidence interval; OR, Odds Ratio.

**Table S4** Association between reading habit (whether reading) and quality of sleep in middle-aged and elderly populations

| Models | OR | 95% CI | *P* |
| --- | --- | --- | --- |
| ***Individuals who report total sleep duration*** | | | |
| Model 0 | 1.117 | 1.076-1.160 | <0.001 |
| Model 1 | 1.047 | 1.005-1.091 | 0.028 |
| Model 2 | 1.121 | 1.079-1.165 | <0.001 |
| Model 3 | 1.097 | 1.056-1.140 | <0.001 |
| Model 4 | 1.057 | 1.017-1.099 | 0.005 |
| Model 5 | 1.031 | 0.987-1.078 | 0.166 |
| ***Individuals who report weekday&weekend days sleep duration*** | | | |
| Model 0 | 1.029 | 1.005-1.053 | 0.018 |
| Model 1 | 0.972 | 0.947-0.998 | 0.033 |
| Model 2 | 1.034 | 1.010-1.058 | 0.005 |
| Model 3 | 1.023 | 0.999-1.048 | 0.064 |
| Model 4 | 0.992 | 0.969-1.016 | 0.521 |
| Model 5 | 0.976 | 0.951-1.001 | 0.064 |

**Notes:** Model 0 only included reading habit as explanatory variable; model 1 was based on model 0 and included demographic information as independent variables; model 2 was based on model 0 and included socioeconomic variables; model 3 was based on model 0 and included lifestyle-related variables; model 4 included health-related variables and reading habits; model 5 included all variables

**Abbreviations:** CI, Confidence interval; OR, Odds Ratio.
